# Supplementary material
Source: PubMed Central journal article supplement (PMC7901023)

Source Data – Extended Data Figure 4c, Iwafuchi/Zaret

Original membranes

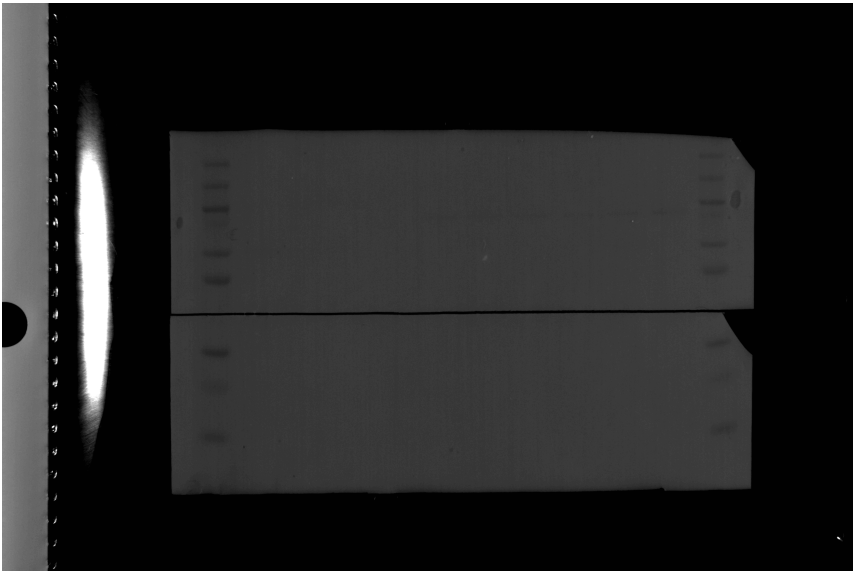

Original blots  
Standard exposure

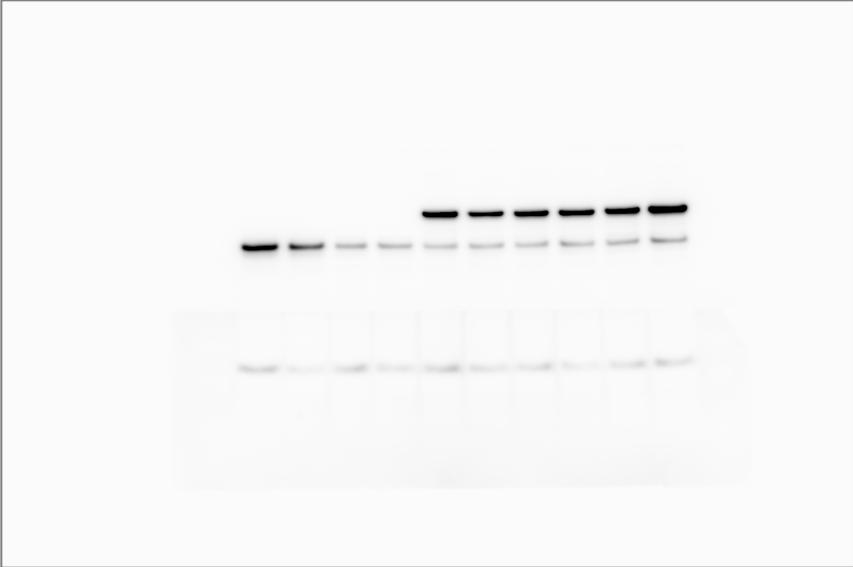

Original blots  
High exposure

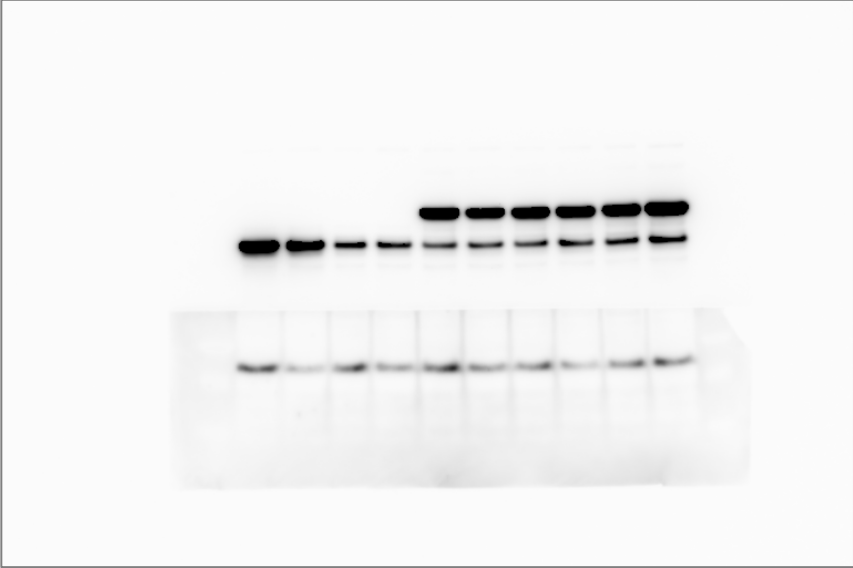

Supplement: NIHMS1562321-supplement-1562321_SourceData_ExtData_Fig4.pdf [file NIHMS1562321-supplement-1562321_SourceData_ExtData_Fig4.pdf]
