# Supplementary material
Source: PubMed Central journal article supplement (PMC7901023)

Source Data - Figure 1d, Iwafuchi/Zaret

Original SDS gel

The third and fourth lanes from the right were deleted in the figure used for the paper.

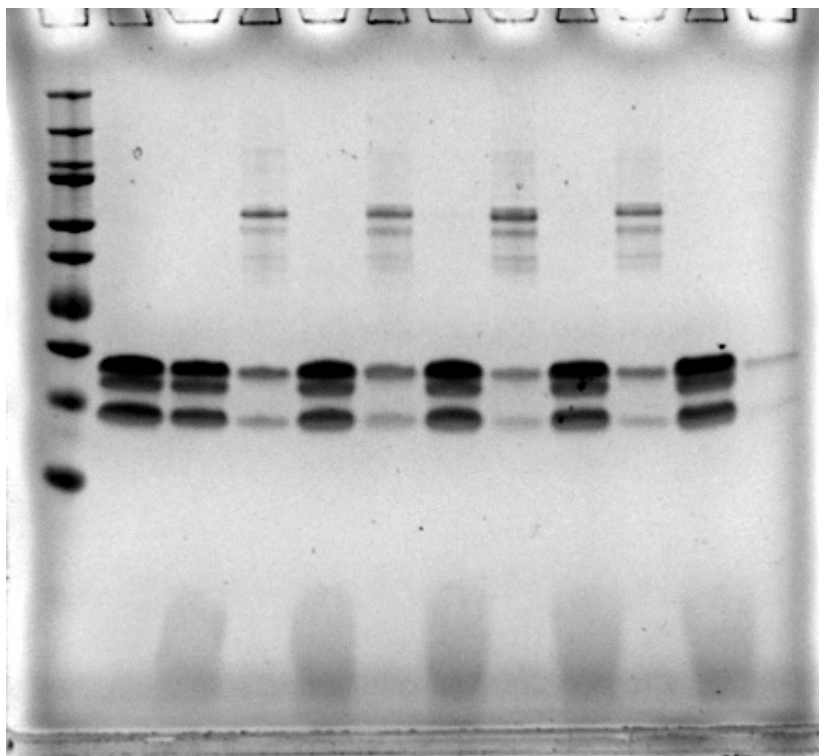

Supplement: NIHMS1562321-supplement-1562321_SourceData_Fig1.pdf [file NIHMS1562321-supplement-1562321_SourceData_Fig1.pdf]
