# Supplementary material
Source: PubMed Central journal article supplement (PMC7901023)

Source Data - Figure 2a, Iwafuchi/Zaret

Original SDS gel photograph

Lanes 2 and 3 from the right were deleted

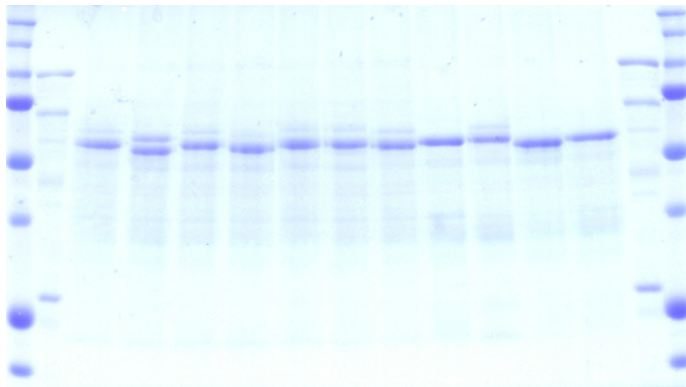

Original autoradiograph

Lanes 6 and 7 from the left side were deleted

Lanes 2, 3, 4, 5 from the right side were deleted

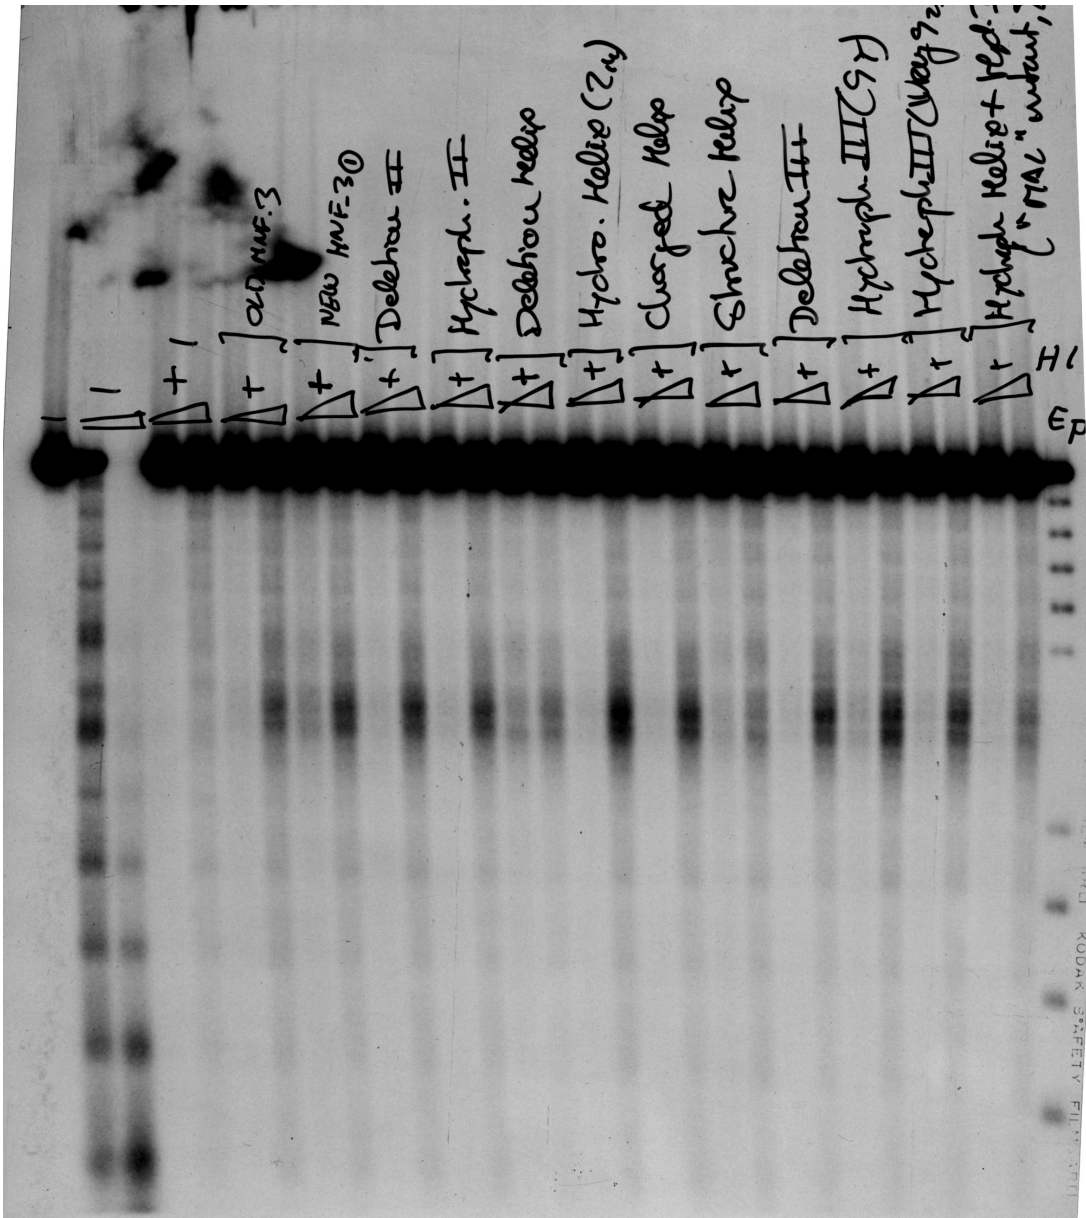

Supplement: NIHMS1562321-supplement-1562321_SourceData_Fig2.pdf [file NIHMS1562321-supplement-1562321_SourceData_Fig2.pdf]
