# Supplementary material
Source: PubMed Central journal article supplement (PMC7901023)

Source Data - Extended Data Figure 1a, Iwafuchi/Zaret

Original SDS gel photograph

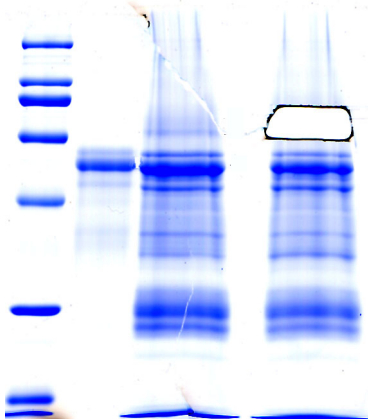

Supplement: NIHMS1562321-supplement-1562321_SourceData_ExtData_Fig1.pdf [file NIHMS1562321-supplement-1562321_SourceData_ExtData_Fig1.pdf]

Source Data – Extended Data Figure 3b, Iwafuchi/Zaret

Original SDS gel photograph

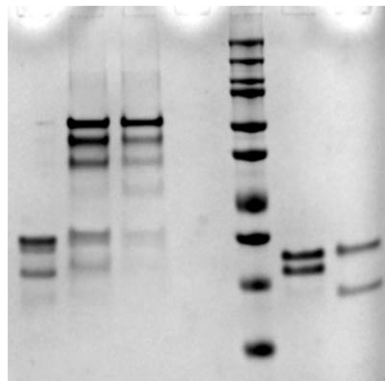

Supplement: NIHMS1562321-supplement-1562321_SourceData_ExtData_Fig3.pdf [file NIHMS1562321-supplement-1562321_SourceData_ExtData_Fig3.pdf]
